# Supplementary material for: An engineered IL-2 reprogrammed for anti-tumor therapy using a semi-synthetic organism
Source: PubMed Central journal article supplement (PMC8352909; doi:10.1038/s41467-021-24987-9), 2021-08-09
Supplement: 41467_2021_24987_MOESM1_ESM.pdf [file 41467_2021_24987_MOESM1_ESM.pdf]

# Supplementary Information

Ptacin et al. 2021

An engineered IL-2 reprogrammed for anti-tumor therapy using a semi-synthetic organism

**Supplementary Table 1.** PEG IL-2 candidate screening using DiscoverX PathHunter recombinant cell-based screening for differential IL-2R $\beta\gamma$  vs  $\alpha\beta\gamma$  agonist activity

| Site   | $\beta\gamma$ EC50 (nM) | $\alpha\beta\gamma$ EC50 (nM) | $\beta\gamma/\alpha\beta\gamma$ ratio |
|--------|-------------------------|-------------------------------|---------------------------------------|
| rhIL-2 | 2.23                    | 0.14                          | 16                                    |
| K35    | 6.75                    | 0.15                          | 45                                    |
| R38    | 4.16                    | 0.17                          | 25                                    |
| T41    | 6.37                    | 0.05                          | 130                                   |
| F42    | 6.09                    | 0.52                          | 12                                    |
| K43    | 9.84                    | 0.13                          | 75                                    |
| Y45    | 9.06                    | 0.11                          | 83                                    |
| E62    | 3                       | 1.5                           | 2                                     |
| E62*   | 7.46                    | 2.84                          | 3                                     |
| P65*   | 23.8                    | 4.44                          | 5                                     |
| E68*   | 7.7                     | 0.09                          | 86                                    |
| V69*   | 9.99                    | 0.08                          | 121                                   |

\* 30kDa mPEG

Discoverx PathHunter assay for IL-2 receptor agonist activity. Human U2OS cells engineered to express the IL-2 receptor  $\beta$  and  $\gamma$  subunits fused to portions of a split enzyme system (EA:  $\beta$  - galactosidase fragment 1; PK:  $\beta$  -galactosidase fragment 2). IL-2 engagement of the  $\beta$  subunit elicits recruitment of the  $\gamma$  subunit and receptor dimerization. Receptor dimerization stimulates reconstitution of the  $\beta$ -galactosidase activity, which is read using chemiluminescence.

Shown are potency statistics for rhIL-2 and IL-2 compounds pegylated with 10 kDa (or 30 kDa where indicated) mPEG modifications in the DiscoverX PathHunter IL-2 receptor  $\beta\gamma$  (second column) and  $\alpha\beta\gamma$  (third column) assays. The  $\beta\gamma$ :  $\alpha\beta\gamma$  EC50 ratios for each test compound are listed in the right column. For a molecule with complete reduction in IL-2R $\alpha$  binding, the  $\beta\gamma$ :  $\alpha\beta\gamma$  EC50 ratio is predicted to be 1, assuming identical receptor subunit stoichiometry between cell lines.

**Supplementary Figure 1.** THOR-707 was identified using recombinant cell-based screening as a potent IL-2R $\beta\gamma$  agonist with reduced IL-2R $\alpha$  engagement

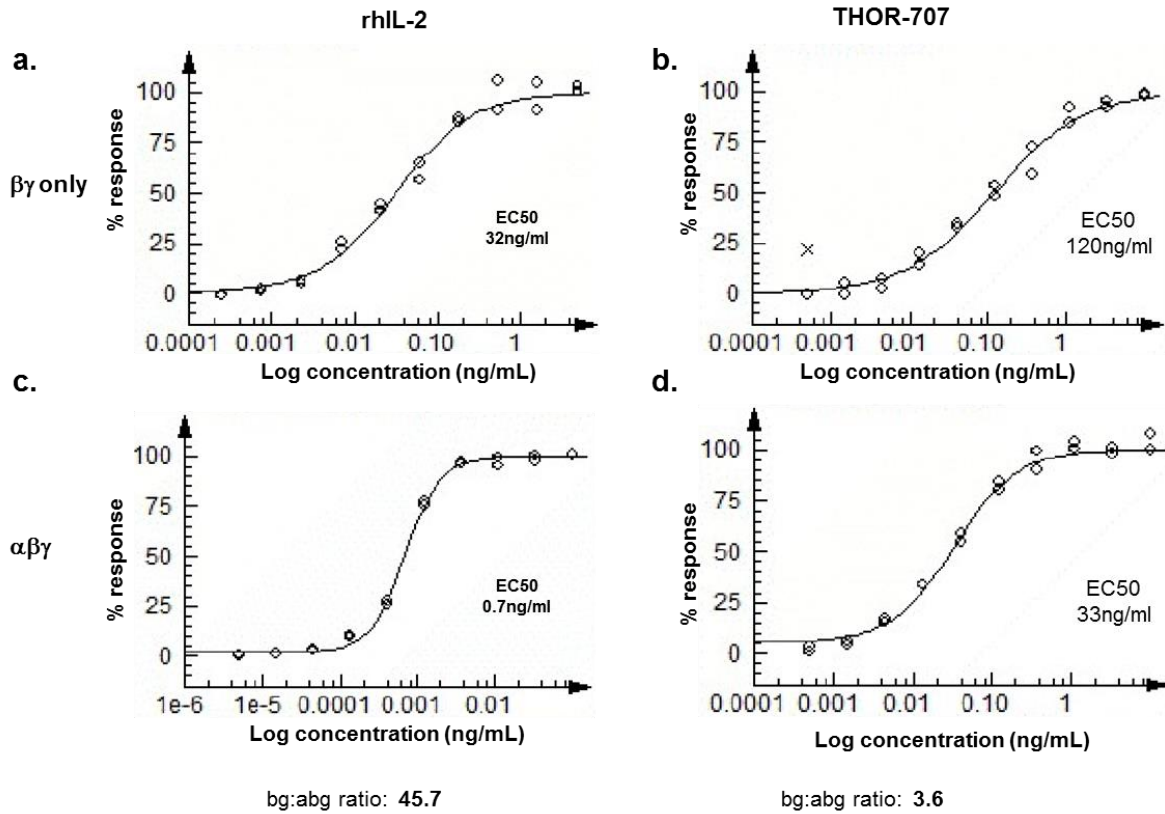

**Supplementary Figure 1.** THOR-707 was identified using recombinant cell-based screening as a potent IL-2R $\beta\gamma$  agonist with reduced IL-2R $\alpha$  engagement. Recombinant human IL-2 (left column) or THOR-707 (right column) were analyzed in the DiscoverX PathHunter IL-2 receptor  $\beta\gamma$  (top row) and  $\alpha\beta\gamma$  (bottom row) assays. Concentration response curves are shown for rhIL-2 in the IL-2R $\beta\gamma$  (A) and  $\alpha\beta\gamma$  assays (B). Concentration response curves are shown for THOR-707 IL-2R $\beta\gamma$  (C) and  $\alpha\beta\gamma$  assays (D). Assays were run in duplicate. Response (Y-axis, percent signal normalized to Aldesleukin) is plotted in percent units, and dose (X-axis, ng/mL) is plotted on a log<sub>10</sub> scale. The  $\beta\gamma$ :  $\alpha\beta\gamma$  EC50 ratios for each test compound are listed at the bottom of the plots. For a molecule with complete reduction in IL-2R $\alpha$  binding, the  $\beta\gamma$ :  $\alpha\beta\gamma$  EC50 ratio is predicted to be 1, assuming identical receptor subunit stoichiometry between cell lines. Source data are provided as a Source Data file.

**Supplementary Figure 2.** Biochemical characterization of THOR-707 interactions with IL-2  $\alpha$  and  $\beta$  receptor subunits using SPR demonstrate “not alpha” signature of THOR-707 and modest PEG size dependence to IL-2 R $\beta$  affinity.

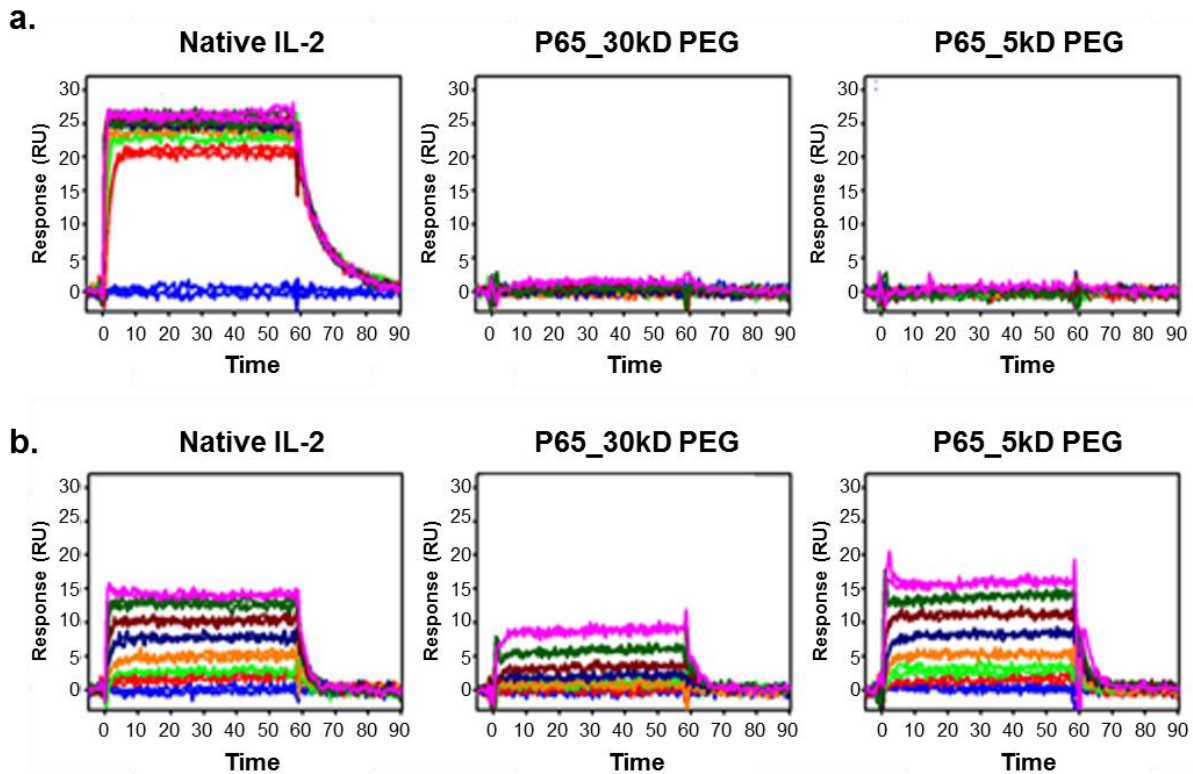

**Supplementary Figure 2.** Biochemical characterization of THOR-707 interactions with IL-2  $\alpha$  and  $\beta$  receptor subunits using SPR demonstrate “not alpha” signature of THOR-707 and modest PEG size dependence to IL-2 R $\beta$  affinity. Human IL-2 R $\alpha$  (A) and  $\beta$  (B) extracellular domains were immobilized on the surface of a SPR sensor and probed in duplicate with two-fold dilution series starting at 2  $\mu$ M of either rhIL-2 (left column), THOR-707 (30kDa mPEG, middle column), or THOR-707 (5kDa mPEG, right column). Test samples were injected for 60 s to allow measurement of association, followed by buffer only (wash) for 30 s to measure dissociation kinetics. Response units (RU, Y-axis) are plotted versus time (s, X-axis). Colors correspond to test concentration as shown in Figure 2b (inset).

**Supplementary Table 2.** Kinetic parameters for rhIL-2 and THOR-707 interactions with human IL-2 R $\alpha$  and R $\beta$  subunit extracellular domain surfaces

| IL-2R $\alpha$ |                       | $k_a(M^{-1}s^{-1})$       | $k_d(s^{-1})$     | $K_D(\mu M)$      |
|----------------|-----------------------|---------------------------|-------------------|-------------------|
|                | rhIL-2                | $4.5 \pm 0.3 \times 10^7$ | $0.410 \pm 0.01$  | $0.009 \pm 0.002$ |
|                | THOR-707 (30kDa mPEG) | $114 \pm 36$              | $0.018 \pm 0.008$ | $158 \pm 21$      |
|                | THOR-707 (5kDa mPEG)  | $797 \pm 226$             | $0.033 \pm 0.004$ | $42 \pm 7$        |
|                |                       |                           |                   |                   |
| IL-2 R $\beta$ |                       | $k_a(M^{-1}s^{-1})$       | $k_d(s^{-1})$     | $K_D(\mu M)$      |
|                | rhIL-2                | $1.3 \pm 0.2 \times 10^6$ | $0.185 \pm 0.009$ | $0.15 \pm 0.05$   |
|                | THOR-707 (30kDa mPEG) | $1.8 \pm 0.2 \times 10^5$ | $0.370 \pm 0.01$  | $2.09 \pm 0.09$   |
|                | THOR-707 (5kDa mPEG)  | $9.0 \pm 0.4 \times 10^5$ | $0.270 \pm 0.01$  | $0.31 \pm 0.02$   |

Values reported represent the mean and standard deviation from a fit of data sets reported. The values for the association rate of rhIL-2 to human IL-2 R $\alpha$  are rapid and mass transport limited under these conditions, leading to a higher measurement error. However, because the association and dissociation rates are highly correlated the ratio of the kinetic parameters for highly mass transport limited data still provides an accurate value for the equilibrium dissociation constant  $K_D$ .

**Supplementary Table 3.** Dose-response curve fit statistics for rhIL-2 and THOR-707 stimulation of pSTAT5 in LRS-based flow cytometry assay for potency

**A. Data for rhIL-2**

| Treatment | Donor | Population | min    | max     | Hill | LoggedX50 | EC50<br>pg/ml | y50    | r2   |
|-----------|-------|------------|--------|---------|------|-----------|---------------|--------|------|
| IL-2      | 1     | CD8        | 1481.1 | 6664.9  | 1.0  | 4.1       | 12792.8       | 4073.0 | 0.99 |
| IL-2      | 2     | CD8        | 1457.6 | 8442.8  | 1.1  | 3.8       | 7065.6        | 4950.2 | 0.95 |
| IL-2      | 3     | CD8        | 1657.9 | 8190.8  | 1.1  | 4.0       | 9198          | 4924.4 | 0.96 |
| IL-2      | 4     | CD8        | 972.3  | 6393.3  | 1.2  | 3.6       | 3915.8        | 3682.8 | 0.99 |
| IL-2      | 5     | CD8        | 687.2  | 6772.7  | 1.0  | 3.8       | 6257.7        | 3729.9 | 0.99 |
| IL-2      | 6     | CD8        | 688.0  | 6797.6  | 1.3  | 3.8       | 5664.1        | 3742.8 | 0.99 |
| IL-2      | 1     | NK cells   | 886.5  | 5966.6  | 1.1  | 3.6       | 3950.3        | 3426.6 | 1.00 |
| IL-2      | 2     | NK cells   | 520.3  | 6316.4  | 1.3  | 3.6       | 4225.5        | 3418.4 | 0.96 |
| IL-2      | 3     | NK cells   | 452.8  | 5090.2  | 1.1  | 3.8       | 5659.2        | 2771.5 | 0.98 |
| IL-2      | 4     | NK cells   | 440.8  | 4077.9  | 1.5  | 3.4       | 2688.9        | 2259.3 | 0.98 |
| IL-2      | 5     | NK cells   | 623.2  | 4575.1  | 1.9  | 3.1       | 1261.7        | 2599.1 | 0.99 |
| IL-2      | 6     | NK cells   | 552.4  | 5450.5  | 1.6  | 3.3       | 2139.5        | 3001.4 | 0.99 |
| IL-2      | 1     | Treg       | 1516.5 | 17201.7 | 1.4  | 1.6       | 38.7          | 9359.1 | 0.98 |
| IL-2      | 2     | Treg       | 618.1  | 16776.3 | 1.0  | 1.6       | 40.1          | 8697.2 | 0.85 |
| IL-2      | 3     | Treg       | 1326.6 | 11103.4 | 1.3  | 1.9       | 73.6          | 6215.0 | 0.94 |
| IL-2      | 4     | Treg       | 414.0  | 11785.6 | 1.2  | 1.4       | 24.9          | 6099.8 | 0.97 |
| IL-2      | 5     | Treg       | 1080.6 | 13965.4 | 1.7  | 1.2       | 14.9          | 7523.0 | 0.97 |
| IL-2      | 6     | Treg       | 1023.9 | 13095.5 | 1.7  | 1.2       | 14.6          | 7059.7 | 0.96 |

**B. Data for THOR-707**

| Treatment | Donor | Population | min    | max    | Hill | LoggedX50 | EC50<br>pg/ml | y50    | r2   |
|-----------|-------|------------|--------|--------|------|-----------|---------------|--------|------|
| THOR-707  | 1     | CD8        | 1373.5 | 6562.3 | 1.9  | 5.0       | 103916.8      | 3967.9 | 0.99 |
| THOR-707  | 2     | CD8        | 1315.2 | 8269.2 | 1.4  | 5.0       | 92984.7       | 4792.2 | 0.98 |
| THOR-707  | 3     | CD8        | 1474.5 | 7986.2 | 1.5  | 5.0       | 102482.4      | 4730.3 | 0.97 |
| THOR-707  | 4     | CD8        | 948.3  | 7123.3 | 1.6  | 4.8       | 65221.1       | 4035.8 | 0.98 |
| THOR-707  | 5     | CD8        | 818.1  | 6061.9 | 2.2  | 4.9       | 88682.5       | 3440.0 | 0.99 |
| THOR-707  | 6     | CD8        | 628.0  | 7841.6 | 1.4  | 5.0       | 103687.3      | 4234.8 | 0.99 |
| THOR-707  | 1     | NK cells   | 857.2  | 5425.1 | 2.0  | 4.6       | 42315.9       | 3141.1 | 0.99 |
| THOR-707  | 2     | NK cells   | 468.1  | 5532.0 | 1.5  | 4.7       | 46090.4       | 3000.0 | 0.98 |
| THOR-707  | 3     | NK cells   | 423.4  | 4664.8 | 1.6  | 4.8       | 56589.5       | 2544.1 | 0.98 |

|          |   |          |        |         |     |     |         |        |      |
|----------|---|----------|--------|---------|-----|-----|---------|--------|------|
| THOR-707 | 4 | NK cells | 414.9  | 4581.0  | 1.5 | 4.6 | 35937   | 2498.0 | 0.98 |
| THOR-707 | 5 | NK cells | 701.5  | 4832.0  | 1.8 | 4.5 | 31720.1 | 2766.8 | 0.97 |
| THOR-707 | 6 | NK cells | 587.4  | 6120.0  | 1.7 | 4.6 | 38020.1 | 3353.7 | 0.98 |
| THOR-707 | 1 | Treg     | 1468.2 | 12885.8 | 5.3 | 4.9 | 88033.2 | 7177.0 | 0.96 |
| THOR-707 | 2 | Treg     | 1037.1 | 12884.8 | 1.5 | 4.8 | 56952.8 | 6960.9 | 0.96 |
| THOR-707 | 3 | Treg     | 1067.7 | 10006.9 | 1.5 | 5.0 | 99608.6 | 5537.3 | 0.99 |
| THOR-707 | 4 | Treg     | 758.6  | 10946.8 | 1.3 | 4.9 | 73033   | 5852.7 | 0.98 |
| THOR-707 | 5 | Treg     | 1097.5 | 12856.4 | 2.4 | 4.8 | 57880.9 | 6976.9 | 0.97 |
| THOR-707 | 6 | Treg     | 939.6  | 12502.1 | 1.8 | 4.8 | 60658.8 | 6720.8 | 0.99 |

**Supplementary Table 4.** Data collection and processing statistics for IL-2 (P65K) structure determination

| <b>Variant</b>                     | <b>IL-2 (P65K)</b>                |
|------------------------------------|-----------------------------------|
| X-ray source                       | PXII/X10SA (SLS <sup>1</sup> )    |
| Wavelength [Å]                     | 1.0000                            |
| Detector                           | EIGER                             |
| Temperature [K]                    | 100                               |
| Space group                        | P 4 <sub>3</sub> 2 <sub>1</sub> 2 |
| Cell: a; b; c; [Å]                 | 73.50; 73.50; 76.97               |
| α; β; γ; [°]                       | 90.0; 90.0; 90.0                  |
| Resolution [Å]                     | 1.79 (1.82-1.79)                  |
| Unique reflections                 | 20517 (983)                       |
| Multiplicity                       | 16.1 (15.7)                       |
| Completeness [%]                   | 100.0 (100.0)                     |
| R <sub>pim</sub> [%] <sup>6</sup>  | 1.3 (48.3)                        |
| R <sub>sym</sub> [%] <sup>3</sup>  | 4.8 (186.6)                       |
| R <sub>meas</sub> [%] <sup>4</sup> | 5.0 (192.9)                       |
| CC1/2 [%]                          | 99.90 (70.10)                     |
| Mean(I)/sd <sup>5</sup>            | 27.8 (1.6)                        |

<sup>1</sup> SWISS LIGHT SOURCE (SLS, Villigen, Switzerland)

<sup>2</sup> values in parenthesis refer to the highest resolution bin.

<sup>3</sup> Equation 1

$$R_{sym} = \frac{\sum_h \sum_i^{n_h} |I_h - I_{h,i}|}{\sum_h \sum_i^{n_h} I_{h,i}} \quad \text{with} \quad \hat{I}_h = \frac{1}{n_h} \sum_i^{n_h} I_{h,i}$$

where  $I_{h,i}$  is the intensity value of the  $i$ th measurement of  $h$

<sup>4</sup> Equation 2

$$R_{meas} = \frac{\sum_h \sqrt{\frac{n_h}{n_h-1}} \sum_i^{n_h} |I_h - I_{h,i}|}{\sum_h \sum_i^{n_h} I_{h,i}} \quad \text{with} \quad \hat{I}_h = \frac{1}{n_h} \sum_i^{n_h} I_{h,i}$$

where  $I_{h,i}$  is the intensity value of the  $i$ th measurement of  $h$

<sup>5</sup> calculated from independent reflections

<sup>6</sup> Equation 3

$$\text{Precision-indicating } R_{pim} = \frac{\sum_h \sqrt{\frac{1}{(N-1)}} |I_{hl} - \langle I_h \rangle|}{\sum_h \langle I_h \rangle}$$



**Supplementary Table 5.** Refinement statistics for IL-2 (P65K)<sup>1</sup>

| <u>Variant</u>                              | <u>IL-2 (P65K)</u> |
|---------------------------------------------|--------------------|
| Resolution [Å]                              | 53.16-1.79         |
| Number of reflections (working /test)       | 18553 / 1964       |
| R <sub>cryst</sub> [%]                      | 19.2               |
| R <sub>free</sub> [%] <sup>2</sup>          | 22.8               |
| Total number of atoms:                      |                    |
| Protein                                     | 1128               |
| Water                                       | 101                |
| Sulfate                                     | 5                  |
| Glycerol                                    | 6                  |
| Deviation from ideal geometry: <sup>3</sup> |                    |
| Bond lengths [Å]                            | 0.015              |
| Bond angles [°]                             | 1.71               |
| Bonded B's [Å <sup>2</sup> ] <sup>4</sup>   | 6.3                |
| Ramachandran plot: <sup>5</sup>             |                    |
| Most favoured regions [%]                   | 94.3               |
| Additional allowed regions [%]              | 5.7                |
| Generously allowed regions [%]              | 0.0                |
| Disallowed regions [%]                      | 0.0                |

<sup>1</sup> Values as defined in REFMAC5, without sigma cut-off

<sup>2</sup> Test-set contains 9.6% of measured reflections

<sup>3</sup> Root mean square deviations from geometric target values

<sup>4</sup> Calculated with MOLEMAN

<sup>5</sup> Calculated with PROCHECK

**Supplementary Figure 3.** Structure of THOR-707 P65K demonstrates that substitution of proline 65 for lysine does not affect IL-2 tertiary structure or positioning of residues contacting IL-2 R $\alpha$  or  $\beta$  subunits

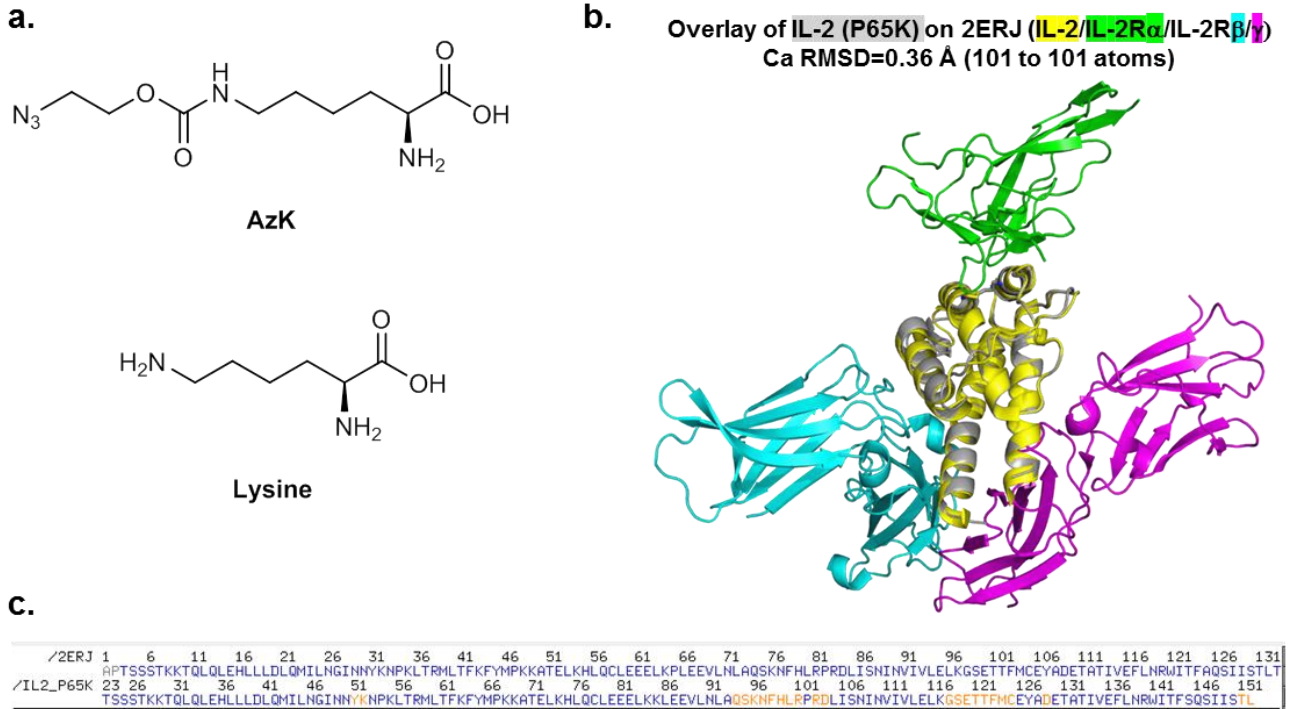

**Supplementary Figure 3.** Structure of THOR-707 P65K demonstrates that substitution of proline 65 for lysine does not affect IL-2 tertiary structure or positioning of residues contacting R $\alpha$  or  $\beta$  subunits. A. Structural similarity of AzK (top) and lysine (bottom) residues. B. Substitution of position 65 with lysine does not affect the overall structure and folding of THOR-707 compared to rhIL-2. The crystal structure of IL-2(P65K) was aligned onto 2ERJ (DOI: 10.2210/pdb2ERJ/ pdb) using PyMOL. The RMSD is 0.36 Å over 101 atoms as PyMOL aligned C $\alpha$  atoms. C. Alignment of rhIL-2 (2ERJ) and IL-2 P65K sequences is shown. Residues corresponding to flexible loop regions that were automatically excluded from the Pymol analysis are highlighted in orange.

**Supplementary Figure 4.** Impact of P65K mutation on the environment of position 65 of IL-2.

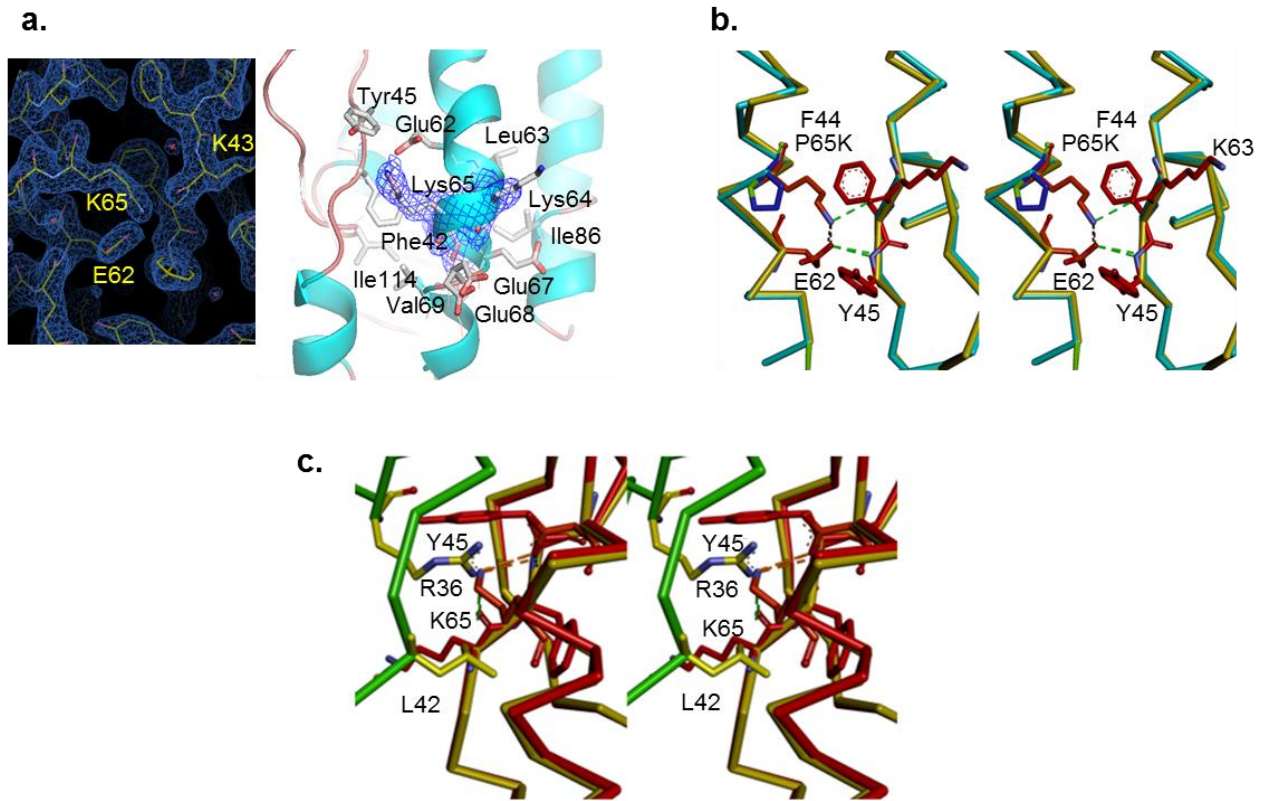

**Supplementary Figure 4.** Impact of P65K mutation on the environment of position 65 of IL-2.

A. The mutation site P65 is located in the center of helix B where the proline residue supports a significant bend of the helix. The electron density of the neighboring four-helix bundle core of the protein is strong and especially Lys65 is completely defined by electron density. The side chain of Lys65 and neighboring protein side chains are shown as stick model, colored according to the chemical atom type superimposed with the refined 2Fo-Fc electron density map contoured at 1.0 angstrom. The residue K65 makes direct contacts with E62 in this structure.

B. Stereo view of the overlay of IL-2 (P65K) (gold) and apo-IL-2 (PDB: 1M47, DOI: 10.1073/pnas.252756299, blue). The overlay of the IL-2-P65K mutant and an the 1M47 apo-IL-2 structure shows that mutation of proline to lysine does not influence the position of backbone and side chain atoms in the near vicinity within experimental error. Some larger deviations are observed toward the loop structures which may be attributed to the inherent flexibility of the loops.

C. Stereo view close-up showing the interface between IL-2 (red: IL-2(P65K); gold IL-2 wild-type) and IL-2R $\alpha$  (green). Lys65 is predicted to collide with R36 of IL-2R $\alpha$ . The crystal structure of the complex between IL-2 and its receptors revealed the interaction between the components IL-2R $\alpha$ , IL-2R $\beta$  and IL-2R $\beta/\gamma$  in detail (PDB: 2ERJ (DOI: 10.2210/pdb2ERJ/pdb)). The interface of IL-2 and IL-2 R $\alpha$  includes a region around position 65 which is composed of hydrophobic interactions but comprises also a buried salt-bridge between Glu62 of IL-2 and Arg36 of IL-2

R $\alpha$ . The overlay between IL-2/receptor complex and IL-2(P65K) shows that the lysine residue introduced in THOR-707 is predicted to collide with Arg36 of IL-2R $\alpha$ . In particular, the epsilon amine group of Lys65 superimposes almost exactly with a guanidinium nitrogen of Arg36. None of the alternative side-chain conformations of Lys65 is predicted to alleviate these clashes. It is therefore predicted that without main-chain alterations in the region from Arg35 to Met44 of IL-2R $\alpha$  the introduction of Lys65 in IL-2 will interfere with binding to IL-2 R $\alpha$ .

**Supplementary Figure 5.** Reduction in THOR-707 engagement of IL-2 R $\alpha$  is mediated largely by AzK substitution at P65, pegylation contributes to minor and non-specific reduction in potency.

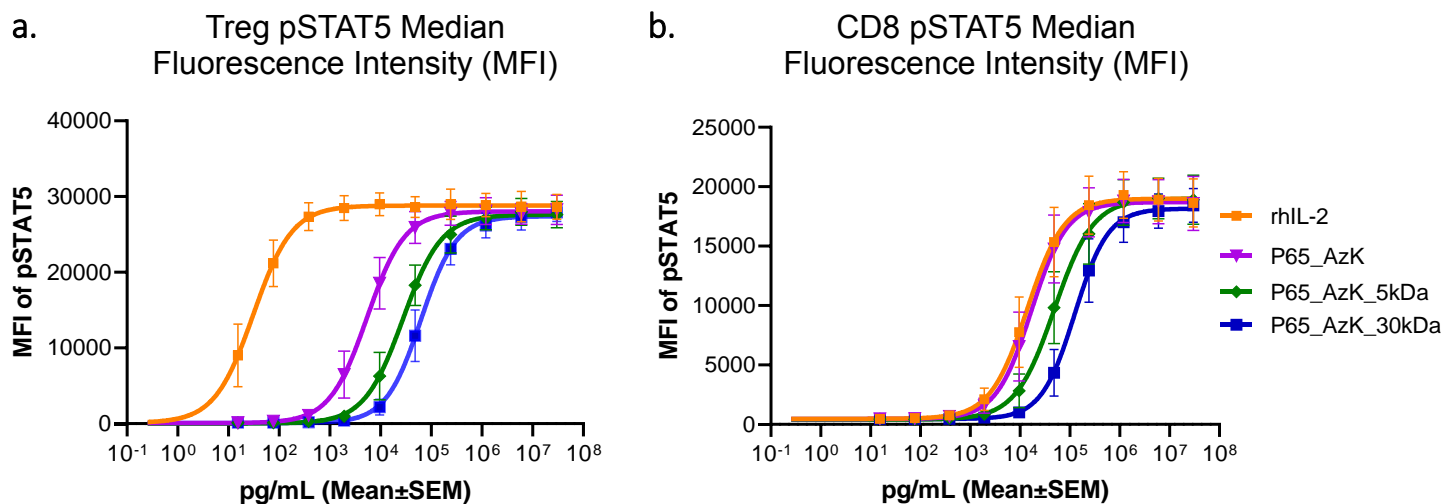

c.

| Compound          | Treg EC50 (pg/mL) | CD8+ T cell EC50 (pg/mL) |
|-------------------|-------------------|--------------------------|
| rhIL-2            | 31                | 14,048                   |
| P65_AzK           | 5446              | 16,908                   |
| P65_AzK_5KDa      | 27,710            | 48,904                   |
| P65_AzK_PEG 30KDa | 62,838            | 125,442                  |

**Supplementary Figure 5.** Reduction in THOR-707 engagement of IL-2 R $\alpha$  is mediated largely by AzK substitution at P65, pegylation contributes to minor and non-specific reduction in potency.

Fresh human PBMC samples from 3 healthy donors were stimulated with concentration series of rhIL-2 or THOR-707 variants with P65AzK (unmodified), P65AzK clicked to a 5kDa mPEG, or THOR-707 (30kDa mPEG substituent). Treated cell populations were analyzed using multi-color flow cytometry to detect and quantify pSTAT5 activation in (A) Treg, and (B) CD8+ T cells. The plots shown represent the average pSTAT5 signal fit to a baseline restrained 4 parameter variable slope least-squares fit, with error bars representing SEM. (C) Table shows the extracted EC50 values for the curves in (A) and (B). The specific reduction in potency in Tregs vs CD8+ T cells for P65AzK compound demonstrates that substitution of P65 with AzK mediates the majority of the “not alpha” pharmacology of THOR-707, while PEGylation results in a PEG-size dependent and non-specific reduction in receptor potency. (n=3 independent donor samples) Source data are provided as a Source Data file.

**Supplementary Figure 6.** THOR-707 demonstrates increased exposure relative to rhIL-2 in mouse.

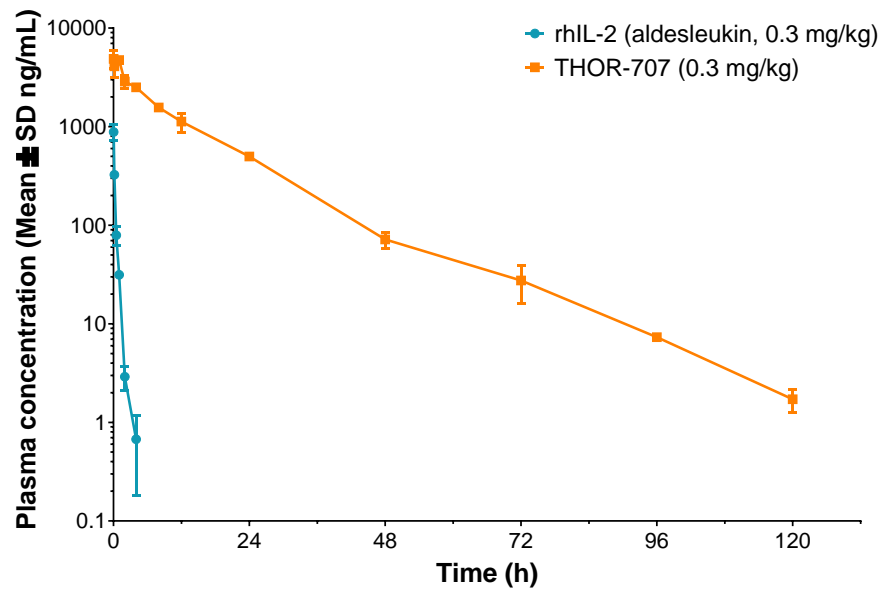

**Supplementary Figure 6. THOR-707 shows increased exposure relative to rhIL-2 in mouse.**

Mean ( $\pm$ SEM) plasma concentration vs. time profiles following a single intravenous bolus dose of rhIL-2 (blue) or THOR-707 (red) to female C57BL/6 mice (the dose refers to IL-2 polypeptide amount). The plot shows mean  $\pm$  standard error (SEM), n= 3 mice per time point. Source data are provided as a Source Data file.

**Supplementary Table 6.** Plasma PK Parameters Following a Single intravenous Dose of rhIL-2 or THOR-707 in Naïve and Tumor-bearing Mice

| Parameter          | Units   | Aldesleukin<br>0.3 mg/kg | THOR-707 Doses (mg/kg) |                          |                          |
|--------------------|---------|--------------------------|------------------------|--------------------------|--------------------------|
|                    |         |                          | 0.3                    | 1                        | 3                        |
|                    |         |                          | naive                  | B16-F10 tumor<br>bearing | B16-F10 tumor<br>bearing |
| T <sub>max</sub>   | h       | 0.030                    | 0.030                  | 2.00*                    | 2.00*                    |
| C <sub>max</sub>   | ng/mL   | 884                      | 4,870                  | 12,900                   | 40,000                   |
| AUC <sub>0-t</sub> | h•ng/mL | 229                      | 45,600                 | 174,000                  | 656,000                  |
| R <sup>2</sup>     | ---     | 0.900                    | 0.992                  | 0.983                    | 0.974                    |
| AUC <sub>INF</sub> | h•ng/mL | 230                      | 45,600                 | 174,000                  | 656,000                  |
| t <sub>1/2</sub>   | h       | 0.573                    | 13.3                   | 14.2                     | 12.6                     |
| CL                 | mL/h/kg | 1,300                    | 6.58                   | 5.74                     | 4.57                     |
| V <sub>ss</sub>    | mL/kg   | 390                      | 82.4                   | 68.4                     | 62.1                     |

\* First time point measured.

Note: R<sup>2</sup> is the goodness-of-fit parameter for the terminal phase of each concentration vs. time profile.

**Supplementary Figure 7.** THOR-707 induced a transient increase in pSTAT5 in NK cells in naïve and B16-F10 tumor-bearing mice

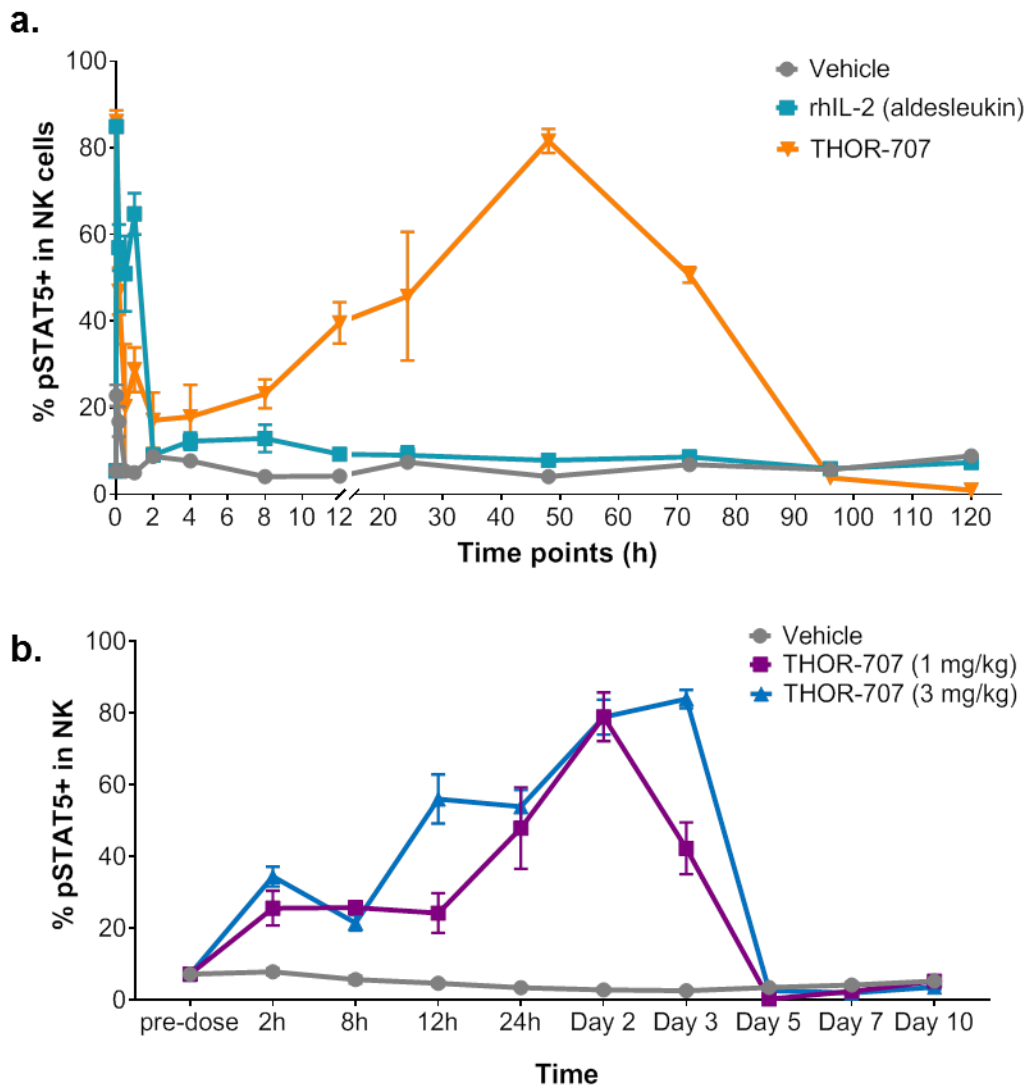

**Supplementary Figure 7.** THOR-707 induced a transient increase in pSTAT5 in NK cells in naïve and B16-F10 tumor-bearing mice. Percentage of pSTAT5+ cells in peripheral blood NK cells following administration of a single intravenous bolus dose of: (A) 0.3 mg/kg of THOR-707 or Aldesleukin to naïve mice, and (B) 1 or 3 mg/kg of THOR-707 to tumor-bearing mice. Blood was drawn via cardiac puncture at the indicated time points and immune cell populations were assessed by FACS. Each data point represents an average from replicates at each time point  $\pm$  SEM. (n=3 animals) Source data are provided as a Source Data file.



**Supplementary Figure 8.** THOR-707 induced a sustained increase in pSTAT5 in CD4+ Tregs

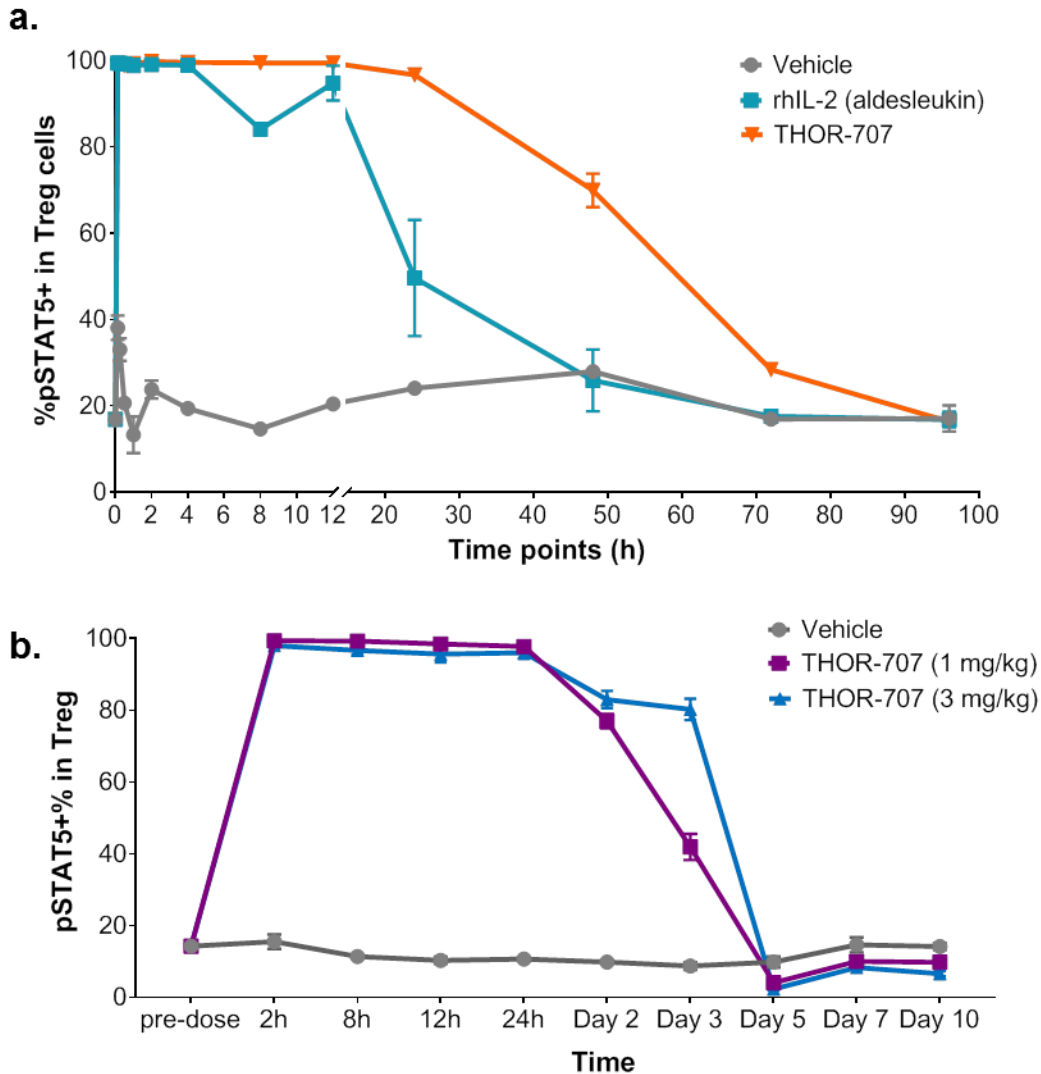

**Supplementary Figure 8.** THOR-707 induced a sustained increase in pSTAT5 in CD4+ Tregs

Percentage of pSTAT5+ cells in peripheral blood CD4+ Treg cells in following administration of a single intravenous bolus dose of: (A) 0.3 mg/kg of THOR-707 or Aldesleukin to naïve mice, and (B) 1 or 3 mg/kg of THOR-707 to tumor-bearing mice. Blood was drawn via cardiac puncture at the indicated time points and immune cell populations were assessed by FACS. Each data point represents an average replicates at each time point  $\pm$  SEM. (n=3 animals) Source data are provided as a Source Data file.

**Supplementary Figure 9.** THOR-707 induced the expression of Ki67 in peripheral blood CD8+ T, NK, and Treg cells

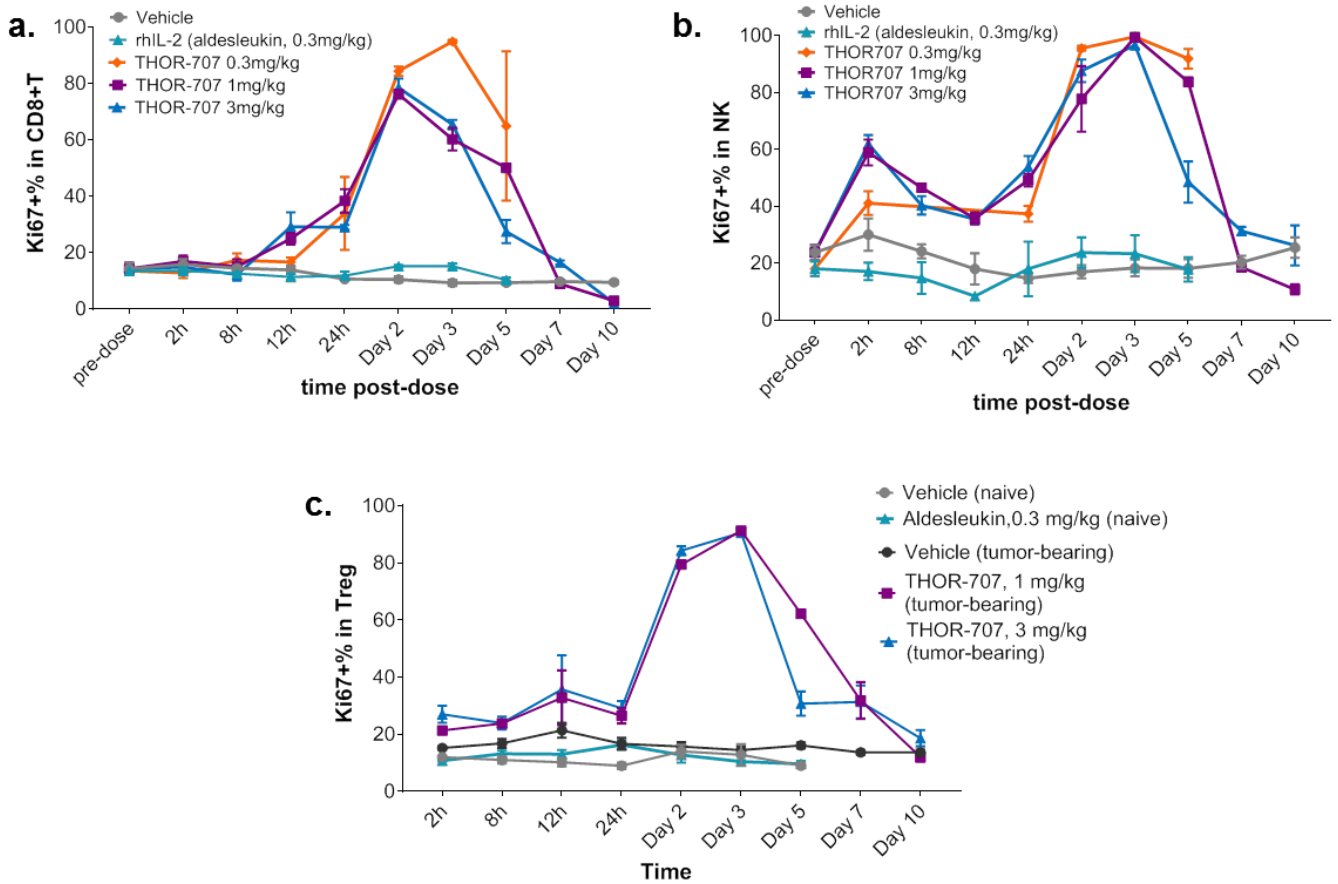

**Supplementary Figure 9.** THOR-707 induced the expression of Ki67 in peripheral blood CD8+ T, NK, and Treg cells. Percentage of Ki67+ cells in peripheral blood: (A) CD8+ T cells, (B) NK cells, and (C) Treg cells following administration of a single intravenous bolus dose of either 0.3 mg/kg of THOR-707 or Aldesleukin to naïve mice or 1 or 3 mg/kg of THOR-707 to tumor-bearing (note in panel C, due to insufficient events during FACS in many time points, the THOR-707 at 0.3 mg/kg group is not included in the figure). Blood was drawn via cardiac puncture at the indicated time points and immune cell populations were assessed by FACS. Each data point represents an average from replicates at each time point  $\pm$  SEM. (n=3 animals) Source data are provided as a Source Data file.

**Supplementary Figure 10.** THOR-707 induced the expansion of peripheral blood CD8+ memory T cells in naïve C57BL/6 mice

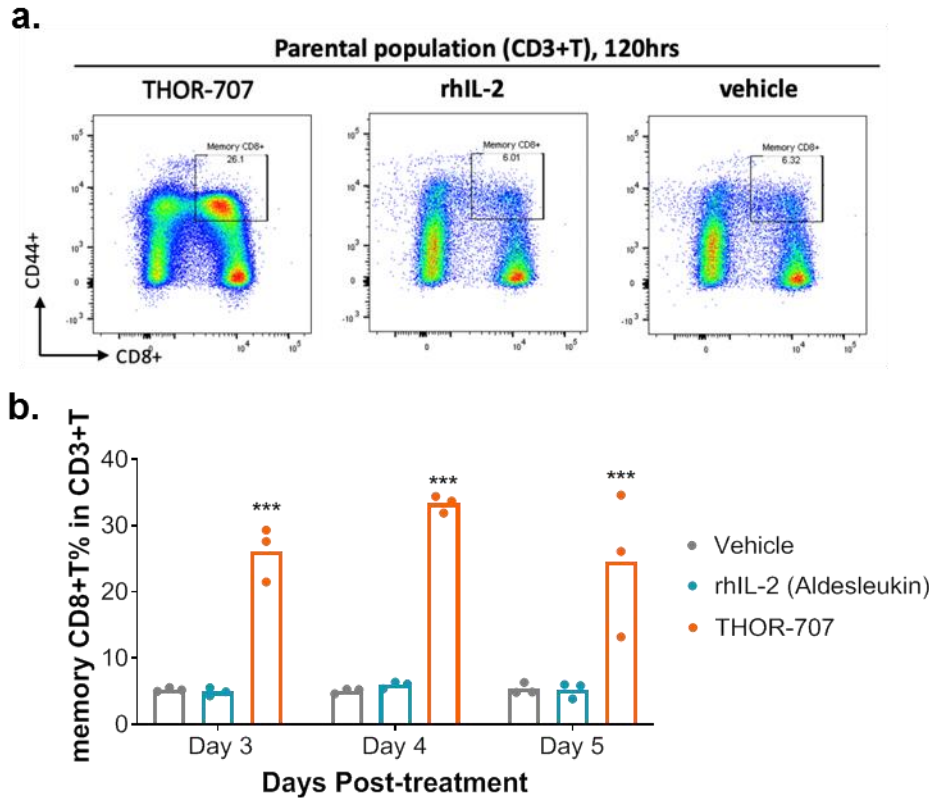

**Supplementary Figure 10.** THOR-707 induced the expansion of peripheral blood CD8+ memory T cells in naïve C57BL/6 mice.

A. Plots showing CD3+ cells analysed for CD44+ (Y axis) and CD8+ (x axis) after treatment with THOR-707 (left), rhIL-2 (middle), or vehicle (right). The memory CD8+ T cell population is indicated and quantitated in the square. B. Percentage of CD8+ memory T cells within the CD3+ T cell population up to 5 days post-dose of a single intravenous bolus dose of THOR-707 or Aldesleukin at 0.3.mg/kg. Each data point represents an average from replicates at each time point  $\pm$  SEM. \*\*\*  $p < 0.001$  vs. vehicle or Aldesleukin, analyzed using unpaired t test. P values  $< 0.05$  were considered significant (\*\*\*) are defined with P values  $< 0.001$  ( $n = 3$  animals) Source data are provided as a Source Data file.

**Supplementary Figure 11.** THOR-707 induced the expansion of peripheral blood CD8+ memory T cells in naïve C57BL/6 mice. A single THOR-707 drives improved CD8+ T and NK cell expansion compared to multiple, frequent Aldesleukin doses, but results in lower serum IL-5 levels. (n=3 animals) Source data are provided as a Source Data file.

- a.** Experimental dosing levels and schedule. Due to the short half-life and limited exposure of rhIL-2, Aldesleukin was dosed BID x 3 to achieve pharmacodynamic response of expansion of CD8+ T cells and NK cells (shown in B).

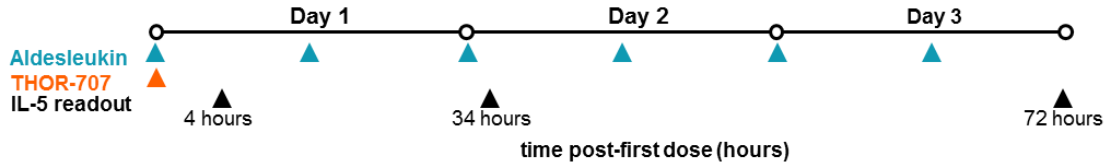

- b.** Pharmacodynamic effects of each compound and dose observed at 72 hours post first dose are shown below, with the percent of total peripheral cells (singlets) that were CD8+ T cells (left) or NK cells (right) shown. Bars represent the mean of the experimental replicates, and points show the values for each individual. Compared to Aldesleukin, THOR-707 administration resulted in similar or increased expansion of CD8+ T and NK cells at all doses.

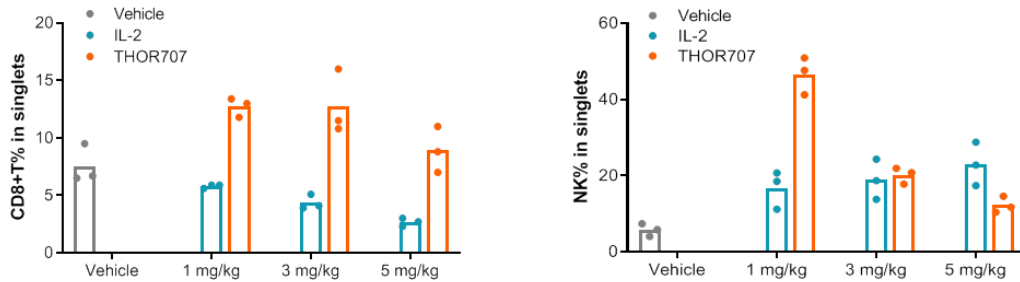

- c.** Serum IL-5 levels (pg/mL) are shown for each dose of Aldesleukin (green) and THOR-707 (orange) at 4hr, 34hr, and 72hr post first-dose. Bars represent the mean serum IL-5 levels (pg/ml) in 3 individual animals, and data points show the values for each individual. Despite the similar or increased expansion of CD8+ T cells and NK cells, administration of THOR-707 resulted in lower IL-5 serum levels at each condition and time.

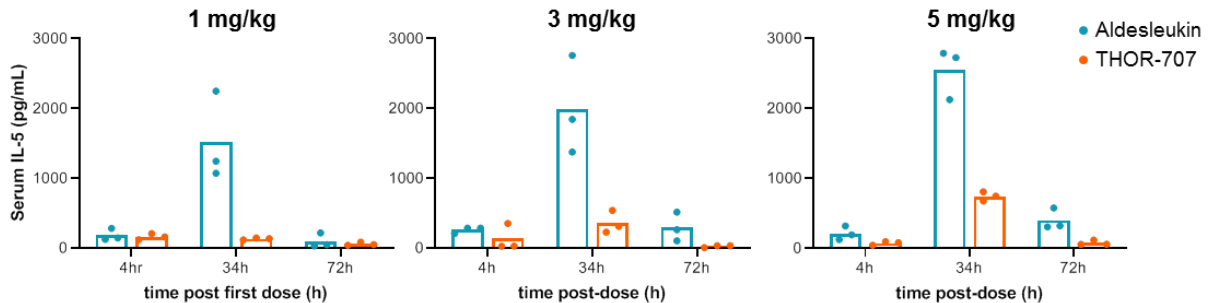

- d.** Serum IL-5 levels (pg/mL) are shown for each dose of Aldesleukin (green) and THOR-707 (orange) at 4hr, 34hr, and 72hr post first-dose. Bars represent the mean serum IL-5 levels (pg/ml) in 3 individual animals, and data points show the values for each individual. Despite the similar or increased levels of expansion of CD8+ T cells and NK cells, administration of THOR-707 resulted in lower IL-5 serum levels at each condition and time.

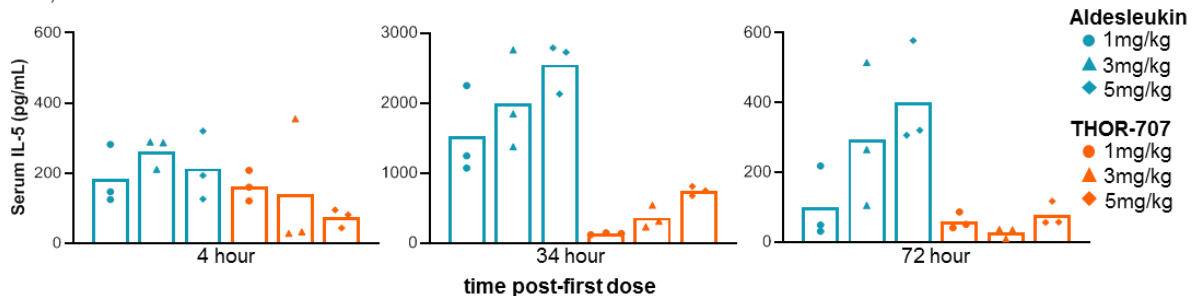

**Supplementary Table 7.** A single THOR-707 drives improved CD8+ T and NK cell expansion compared to multiple, frequent Aldesleukin doses, but results in lower plasma IL-5 levels

Data table showing the raw values from individual animals for serum IL-5 levels (pg/mL) for each dose of Aldesleukin and THOR-707 at 4hr, 34hr, and 72hr.

| 4 hours time point  |         |      |      |             |        |        |          |       |       |
|---------------------|---------|------|------|-------------|--------|--------|----------|-------|-------|
| Dose (mg/kg)        | Vehicle |      |      | Aldesleukin |        |        | THOR-707 |       |       |
| 0                   | 36.7    | 12.9 | 16.9 |             |        |        |          |       |       |
| 1                   |         |      |      | 124.6       | 281.8  | 146.6  | 120.3    | 159.6 | 207.7 |
| 3                   |         |      |      | 286.5       | 288.4  | 210.6  | 32.2     | 27.8  | 354.7 |
| 5                   |         |      |      | 193.4       | 126.1  | 319.8  | 94.6     | 43.4  | 81.0  |
| 34 hours time point |         |      |      |             |        |        |          |       |       |
| Dose (mg/kg)        | Vehicle |      |      | Aldesleukin |        |        | THOR-707 |       |       |
| 0                   | 12.0    | 1.9  | 5.0  |             |        |        |          |       |       |
| 1                   |         |      |      | 1072.4      | 2249.1 | 1245.8 | 119.2    | 145.6 | 135.7 |
| 3                   |         |      |      | 2759.5      | 1845.2 | 1377.2 | 312.8    | 230.3 | 540.9 |
| 5                   |         |      |      | 2789.3      | 2128.1 | 2727.4 | 676.9    | 809.0 | 746.4 |
| 72 hours time point |         |      |      |             |        |        |          |       |       |
| Dose (mg/kg)        | Vehicle |      |      | Aldesleukin |        |        | THOR-707 |       |       |
| 0                   | 2.6     | 0.8  | 1.8  |             |        |        |          |       |       |
| 1                   |         |      |      | 30.6        | 218.1  | 48.9   | 50.7     | 40.9  | 86.5  |
| 3                   |         |      |      | 515.4       | 265.0  | 105.2  | 35.2     | 9.3   | 36.3  |
| 5                   |         |      |      | 578.2       | 320.7  | 306.3  | 57.3     | 56.4  | 117.1 |

**Supplementary Figure 12.** THOR-707 shows enhanced retention in tumor tissue relative to plasma and spleen tissue in B16-F10 tumor bearing mice.

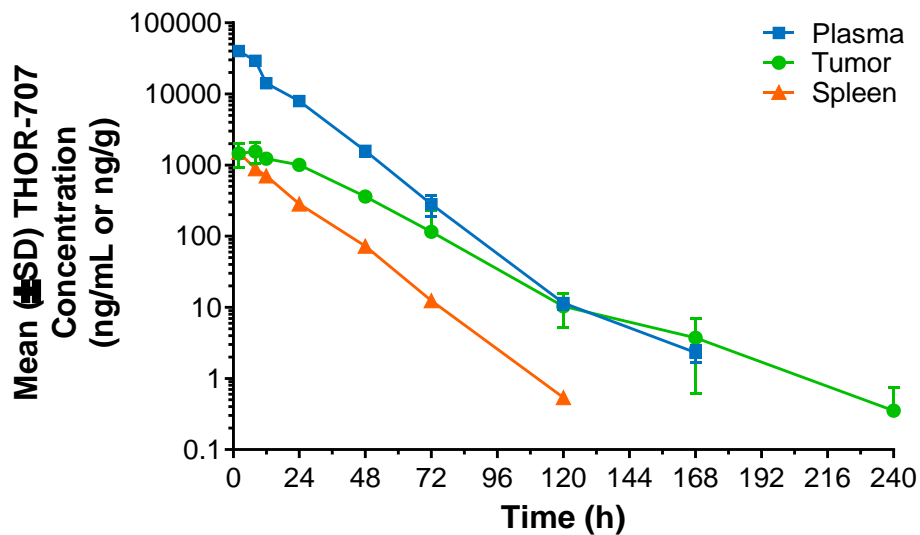

**Supplementary Figure 12.** THOR-707 shows enhanced retention tumor tissue relative to plasma and spleen tissue in B16-F10 tumor bearing mice. Plasma, tumor, and spleen PK following administration of a single bolus intravenous dose of THOR-707 at 3 mg/kg. The plot shows mean  $\pm$  SD, n = 3 mice per time point. Errors for some points are small and obscured by the marker. Source data are provided as a Source Data file

**Supplementary Table 8.** THOR-707 plasma, tumor, and spleen PK Parameters in B16-F10 tumor-bearing C57BL/6 Mice

| Parameter                    | THOR-707 Dose |        |        |         |        |        |
|------------------------------|---------------|--------|--------|---------|--------|--------|
|                              | 1 mg/kg       |        |        | 3 mg/kg |        |        |
|                              | Plasma        | Tumor  | Spleen | Plasma  | Tumor  | Spleen |
| T <sub>max</sub> (h)         | 2.00          | 8      | 2.00   | 2.00    | 8      | 2.00   |
| C <sub>max</sub> (ng/mL)     | 12,900        | 463    | 466    | 40,000  | 1,550  | 1,510  |
| t <sub>1/2</sub> (h)         | 14.20         | 25.80  | 10.80  | 12.60   | 24.60  | 10.20  |
| AUC <sub>0-t</sub> (h•ng/mL) | 174,000       | 16,800 | 7,040  | 656,000 | 55,200 | 23,500 |
| R <sup>2</sup>               | 0.983         | 1.0    | 0.991  | 0.974   | 0.988  | 0.999  |
| AUC <sub>INF</sub> (h•ng/mL) | 174,000       | 16,800 | 7,040  | 656,000 | 55,200 | 23,500 |

**Supplementary Figure 13.** THOR-707 strongly induced the CD8+ T cell expansion and increased the CD8+ T/Treg ratio in the spleens of tumor-bearing mice

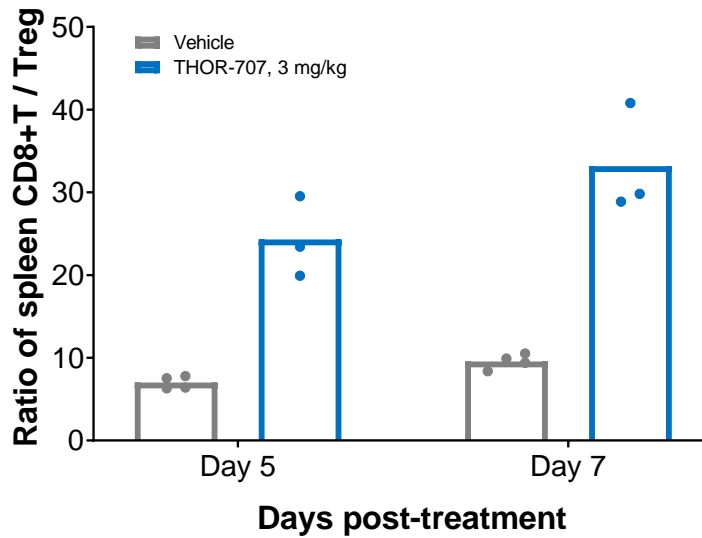

**Supplementary Figure 13.** THOR-707 strongly induced the CD8+ T cell expansion and increased the CD8+ T/Treg ratio in the spleens of tumor-bearing mice. The ratio of CD8+ T over CD4+ Treg cells at 5 and 7 days following treatment with a single 3 mg/kg intravenous bolus dose of THOR-707. Each data point represents an average from replicates at each time point  $\pm$  SEM (N=4 vehicle, N=3 THOR-707). Source data are provided as a Source Data file.



**Supplementary Figure 14.** THOR-707 induced the expansion of peripheral blood CD8+ T cells

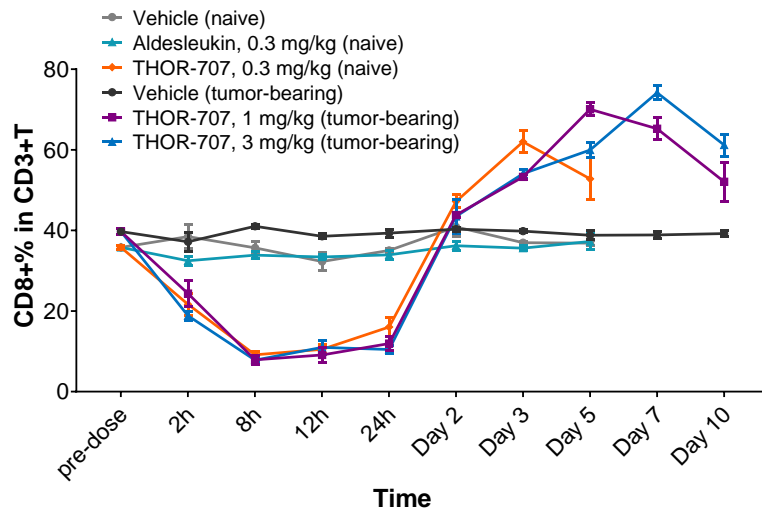

**Supplementary Figure 14.** THOR-707 induced the expansion of peripheral blood CD8+ T cells

Percentage of CD8+ cells within the CD3+ T cell population following administration of a single intravenous bolus dose of THOR-707 (0.3, 1, and 3 mg/kg) or Aldesleukin. (0.3 mg/kg). Blood was drawn via cardiac puncture at the indicated time points and immune cell populations were assessed by FACS. Each data point represents an average from replicates at each time point  $\pm$  SEM. (n=3 animals) Source data are provided as a Source Data file.

**Supplementary Figure 15.** THOR-707 induced the expansion of peripheral blood NK cells yet minimally expanded Treg cells.

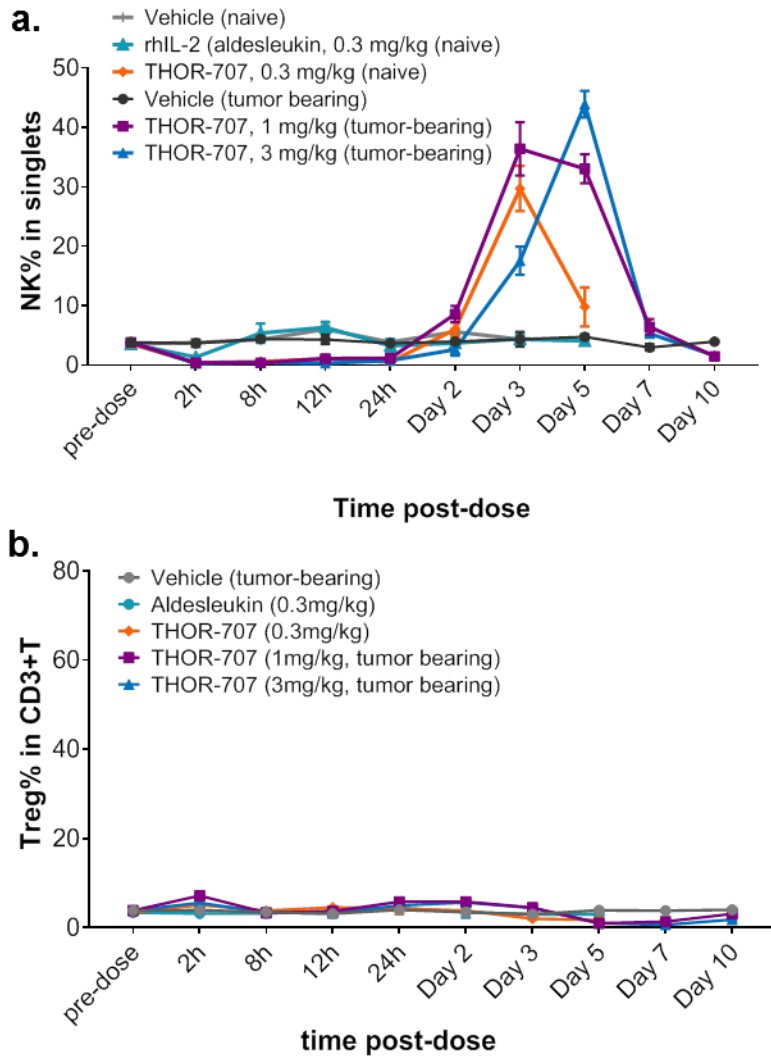

**Supplementary Figure 15.** THOR-707 induced the expansion of peripheral blood NK cells yet minimally expanded Treg cells. Percentage of peripheral blood (A) NK cells and (B) Treg cells following administration of a single intravenous bolus dose of THOR-707 (0.3, 1, or 3 mg/kg) or Aldesleukin. (0.3 mg/kg). Blood was drawn via cardiac puncture at the indicated time points and NK and Treg cell populations were assessed by FACS. Each data point represents an average from replicates at each time point  $\pm$  SEM. (n=3 animals) Source data are provided as a Source Data file.

**Supplementary Table 9.** Analytical summary for custom nucleotides used in this study

|                                                                                                                                                                                                                                                                                                                                                                                                                                                                                                                         |
|-------------------------------------------------------------------------------------------------------------------------------------------------------------------------------------------------------------------------------------------------------------------------------------------------------------------------------------------------------------------------------------------------------------------------------------------------------------------------------------------------------------------------|
| Compound: dNaMTP (100mM)                                                                                                                                                                                                                                                                                                                                                                                                                                                                                                |
| Lot #: LN180808dNaM                                                                                                                                                                                                                                                                                                                                                                                                                                                                                                     |
| Manufacturer: MyChem Inc (San Diego, CA)                                                                                                                                                                                                                                                                                                                                                                                                                                                                                |
| Purity by HPLC 98.2%; <sup>1</sup> H NMR (400 MHz, D <sub>2</sub> O): δ 8.08 (s, 1H), 7.96–7.97 (D, 1H), 7.88–7.89 (d, 1H), 7.53–7.56 (t, 1H), 7.45–7.48 (t, 1H), 7.41 (s, 1H), 5.60–5.63 (q, 1H), 4.78 (1H with H <sub>2</sub> O peak), 4.29 (m, 1H), 4.21 (m, 2H), 4.00 (s, 3H), 2.44–2.48 (m, 1H), 2.23–2.28 (m, 1H); <sup>31</sup> P NMR: -5.21ppm (d, 1P), -9.92 ppm (d, 1P), -20.10 ppm (t, 1P); [M] <sup>+</sup> calcd. for C <sub>16</sub> H <sub>21</sub> O <sub>13</sub> P <sub>3</sub> , 514.2; found, 513.1 |
| Compound: NaMTP (100mM)                                                                                                                                                                                                                                                                                                                                                                                                                                                                                                 |
| Lot #: LN181108NaM                                                                                                                                                                                                                                                                                                                                                                                                                                                                                                      |
| Manufacturer: MyChem Inc (San Diego, CA)                                                                                                                                                                                                                                                                                                                                                                                                                                                                                |
| Purity by HPLC 99.5%; <sup>1</sup> H NMR (400 MHz, D <sub>2</sub> O): δ 8.10 (s, 1H), 7.97–7.97 (D, 1H), 7.85–7.87 (d, 1H), 7.53–7.55 (t, 1H), 7.43–7.47 (t, 1H), 7.39 (s, 1H), 5.31–5.32 (q, 1H), 4.78 (1H with H <sub>2</sub> O peak), 4.34–4.37 (m, 2H), 4.27–4.33 (m, 2H), 3.99 (s, 3H); <sup>31</sup> P NMR: -4.79ppm (d, 1P), -10.20 ppm (d, 1P), -20.20 ppm (t, 1P); [M] <sup>+</sup> calcd. for C <sub>16</sub> H <sub>21</sub> O <sub>15</sub> P <sub>3</sub> , 530.2; found, 529.1                            |
| Compound: dTPT3TP (100mM)                                                                                                                                                                                                                                                                                                                                                                                                                                                                                               |
| Lot #: LN180402dTpT3                                                                                                                                                                                                                                                                                                                                                                                                                                                                                                    |
| Manufacturer: MyChem Inc (San Diego, CA)                                                                                                                                                                                                                                                                                                                                                                                                                                                                                |
| Purity by HPLC 98.0%; <sup>1</sup> H NMR (400 MHz, D <sub>2</sub> O): δ 8.47–8.19 (d, 1H), 8.09–8.10 (D, 1H), 7.62–7.63 (d, 1H), 7.52–7.54 (d, 1H), 7.42–7.45 (t, 1H), 7.41 (s, 1H), 4.78 (1H with H <sub>2</sub> O peak), 4.35–4.38 (m, 2H), 2.77–2.82 (m, 1H), 2.36–2.42 (m, 1H); <sup>31</sup> P NMR: -4.77ppm (d, 1P), -10.46 ppm (d, 1P), -20.27 ppm (t, 1P); [M] <sup>+</sup> calcd. for C <sub>12</sub> H <sub>16</sub> NO <sub>12</sub> P <sub>3</sub> S <sub>2</sub> , 523.3; found, 522.1.                    |
| Compound: TPT3TP (100mM)                                                                                                                                                                                                                                                                                                                                                                                                                                                                                                |
| Lot #: LN180828TpT3                                                                                                                                                                                                                                                                                                                                                                                                                                                                                                     |
| Manufacturer: MyChem Inc (San Diego, CA)                                                                                                                                                                                                                                                                                                                                                                                                                                                                                |
| Purity by HPLC 98.5%; <sup>1</sup> H NMR (400 MHz, D <sub>2</sub> O): δ 8.48–8.49 (d, 1H), 8.07–8.08 (D, 1H), 7.57–7.58 (d, 1H), 7.49–7.50 (d, 1H), 7.13 (s, 1H), 4.78 (1H with H <sub>2</sub> O peak), 4.47–4.52 (m, 2H), 4.42–4.44 (m, 1H); 4.38–4.41 (m, 1H); <sup>31</sup> P NMR: -5.73ppm (d, 1P), -10.52 ppm (d, 1P), -21.48 ppm (t, 1P); [M] <sup>+</sup> calcd. for C <sub>12</sub> H <sub>16</sub> NO <sub>13</sub> P <sub>3</sub> S <sub>2</sub> , 539.3; found, 538.0.                                       |

**Supplementary Table 10.** Oligonucleotides used in this study

| Primer Name                         | Sequence                                                                                             | Description                                                                                                                       |
|-------------------------------------|------------------------------------------------------------------------------------------------------|-----------------------------------------------------------------------------------------------------------------------------------|
| IL-2 K35<br>AXC oligo               | GAACGGCATCAACAACCTACAAAAATCCGA-<br>NaM-<br>CCTGACCCGTATGCTGACCTTCAAATTCTACAT<br>GCCGAAAAAAGCAACCGAGC | Unnatural oligonucleotide for generation of IL-2 K35 AXC Golden Gate Insert used in assembly of expression plasmid                |
| IL-2 R38<br>AXC oligo               | GAACGGCATCAACAACCTACAAAAATCCGAAACT<br>GACCA-NaM-<br>CATGCTGACCTTCAAATTCTACATGCCGAAAA<br>AGCAACCGAGC  | Unnatural oligonucleotide for generation of IL-2 R38 AXC Golden Gate Insert used in assembly of expression plasmid                |
| IL-2 T41<br>AXC oligo               | GAACGGCATCAACAACCTACAAAAATCCGAAACT<br>GACCCGTATGCTGA-NaM-<br>CTTCAAATTCTACATGCCGAAAAAAGCAACCGA<br>GC | Unnatural oligonucleotide for generation of IL-2 T41 AXC Golden Gate Insert used in assembly of expression plasmid                |
| IL-2 F42<br>AXC oligo               | GAACGGCATCAACAACCTACAAAAATCCGAAACT<br>GACCCGTATGCTGACCANCAAATTCTACATGCC<br>GAAAAAAGCAACCGAGC         | Unnatural oligonucleotide for generation of IL-2 F42 AXC Golden Gate Insert used in assembly of expression plasmid                |
| IL-2 Y45<br>AXC oligo               | GAACGGCATCAACAACCTACAAAAATCCGAAACT<br>GACCCGTATGCTGACCTTCAAATTCA-NaM-<br>ATGCCGAAAAAAGCAACCGAGCTGAA  | Unnatural oligonucleotide for generation of IL-2 Y45 AXC Golden Gate Insert used in assembly of expression plasmid                |
| JP425 IL-2<br>K35-43 GG<br>insert F | TATTGGTCTCTTCTGAACGGCATCAACAACCTAC<br>AAAAATC                                                        | Forward primer for generation of IL-2 K35-43 Golden Gate Inserts used in assembly of expression plasmids                          |
| JP426 IL-2<br>K35-43 GG<br>insert R | TATTGGTCTCTTTCAGCTCGGTTGCTTTTTTTCG<br>GCATG                                                          | Reverse primer for generation of IL-2 K35-43 Golden Gate Inserts used in assembly of expression plasmids                          |
| JP504 K35-<br>43 GG<br>insert R2    | TATTGGTCTCTTTCAGCTCGGTTGCTTTTTTTC                                                                    | Reverse primer for generation of IL-2 K35-43 Golden Gate Inserts (sites T41, F42 and Y45) used in assembly of expression plasmids |
| JP427 IL-2<br>K35-43 GG<br>vector F | GTACCGGTCTCCTGAAACATCTGCAGTGTCTG                                                                     | Forward primer for generation of IL-2 K35-43 Golden Gate Entry Vector used in assembly of expression plasmids                     |
| JP428 IL-2<br>K35-43 GG<br>vector R | CGGTCTCTCAGAATCATTTCAGATC                                                                            | Reverse primer for generation of IL-2 K35-43 Golden Gate Entry Vector used in assembly of expression plasmids                     |
| IL-2 E62<br>AXC oligo               | GAGCTGAAACATCTGCAGTGTCTGGAAGAAA-<br>NaM-<br>CCTGAAACCGCTGGAAGAGGTTCTGAATCTGGC<br>ACAGAG              | Unnatural oligonucleotide for generation of IL-2 E62 AXC Golden Gate Insert used in assembly of expression plasmid                |
| THOR-707<br>IL-2 P65<br>AXC oligo   | CATCTGCAGTGTCTGGAAGAAGAAGTAAAA-<br>NaM-<br>CCTGGAAGAGGTTCTGAATCTGGCACAGAGCAA<br>AAACTTTCATCTGCG      | Unnatural oligonucleotide for generation of THOR-707 IL-2 P65 AXC Golden Gate Insert used in assembly of expression plasmid       |
| JP546 IL-2<br>E62-65 GG<br>insert F | TATTGGTCTCAACCGAGCTGAAACATCTGCAGT<br>GTC                                                             | Forward primer for generation of IL-2 E62-65 Golden Gate Inserts used in assembly of expression plasmids                          |

|                                     |                                                                                                   |                                                                                                                                |
|-------------------------------------|---------------------------------------------------------------------------------------------------|--------------------------------------------------------------------------------------------------------------------------------|
| JP547 IL-2 E62-65 GG insert R       | TATTGGTCTCTTTGCTCTGTGCCAGATTCAGAA<br>CCTCTTCCCTGGAAGAGGTTCTGAATCTGGCAC<br>AGAGCAAAAACCTTTCATCTGCG | Reverse primer for generation of IL-2 E62-65 Golden Gate Inserts used in assembly of expression plasmids                       |
| JP548 GG vector F                   | GTACCGGTCTCAGCAAAAACCTTTCATCTGCGTC<br>CGCGTG                                                      | Forward primer for generation of THOR-707 Golden gate entry vector used in assembly of expression plasmids                     |
| JP549 GG vector R                   | CGGTCTCTCGGTTGCTTTTTTTCGGCATGTAG                                                                  | Reverse primer for generation of THOR-707 Golden Gate entry vector used in assembly of expression plasmids                     |
| IL-2 E68 AXC oligo                  | GTCTGGAAGAAGAAGAACTGAAACCGCTGGAAA-<br>-NaM-<br>CGTTTCTGAATCTGGCACAGAGCAAAAACCTTTC                 | Unnatural oligonucleotide for generation of IL-2 E68 AXC Golden Gate Insert used in assembly of expression plasmid             |
| IL-2 V69 AXC oligo                  | GTCTGGAAGAAGAAGAACTGAAACCGCTGGAAGAGA<br>-NaM-<br>CCTGAATCTGGCACAGAGCAAAAACCTTTC                   | Unnatural oligonucleotide for generation of IL-2 V69 AXC Golden Gate Insert used in assembly of expression plasmid             |
| JP500 IL-2 E68-69 GG insert F       | TATTGGTCTCTGTCTGGAAGAAGAAGCTGAAACC<br>GCTG                                                        | Forward primer for generation of IL-2 E68-69 Golden Gate Inserts used in assembly of expression plasmids                       |
| JP501 IL-2 E68-69 GG insert R       | TATTGGTCTCCGCAGATGAAAGTTTTTGCTCTG<br>TGCCAGATTC                                                   | Reverse primer for generation of IL-2 E68-69 Golden Gate Inserts used in assembly of expression plasmids                       |
| JP502 IL-2 E68-69 GG vector R       | CCGGTCTCCAGACACTGCAGATGTTTTC                                                                      | Reverse primer for generation of IL-2 E68-69 Golden Gate Inserts used in assembly of expression plasmids                       |
| JP503 IL-2 E68-69 GG vector F       | TACCGGTCTCTCTGCGTCCGCGTGATCTGATTA<br>G                                                            | Forward primer for generation of IL-2 E68-69 Golden Gate Inserts used in assembly of expression plasmids                       |
| Mm <i>pylT</i> U25C AXC GG template | GAATCTAACCCTGCTGAACCGGATTA-NaM-<br>CAGTCCGTTTCGATCTACATGATCAGG                                    | Unnatural oligonucleotide for generation of Mm <i>pylT</i> U25C AXC Golden Gate Insert used in assembly of expression plasmids |
| JP342 Mm <i>pylT</i> GG insert F    | ATGGGTCTCGAAACCTGATCATGTAGATCGAAC<br>G                                                            | Forward primer for generation of Mm <i>pylT</i> Golden Gate Insert used in assembly of expression plasmids                     |
| JP343 Mm <i>pylT</i> GG insert R    | ATGGGTCTCATCTAACCCTGCTGAAC                                                                        | Reverse primer for generation of Mm <i>pylT</i> Golden Gate Insert used in assembly of expression plasmids                     |

**Supplementary Table 11.** Antibodies used in flow cytometry assays for pSTAT5 induction in primary human PBMC

| Antigen      | Fluorophore | Clone           | Vendor      | Catalog #  | dilution |
|--------------|-------------|-----------------|-------------|------------|----------|
| CD4          | BUV737      | SK3             | BD          | 564305     | 1:50     |
| CD4          | PE-Cy7      | RPA-T4          | Biolegend   | 300512     | 1:200    |
| CD56         | BV711       | HCD56           | Biolegend   | 318336     | 1:100    |
| CD56         | BV421       | HCD56           | Biolegend   | 318328     | 1:100    |
| CD16         | BV711       | 3G8             | Biolegend   | 302044     | 1:100    |
| CD8          | BUV805      | SK1             | BD          | 564912     | 1:50     |
| CD8          | PerCP-Cy5.5 | RPA-T8          | BD          | 560662     | 1:100    |
| CD27         | BV786       | L128            | BD          | 563327     | 1:25     |
| CD45RA       | BUV395      | HI100           | BD          | 740298     | 1:50     |
| CD45RA       | A488        | HI100           | Biolegend   | 304114     | 1:500    |
| CD127        | FITC        | eBioRDR5        | eBioscience | 11-1278-42 | 1:50     |
| CD127        | eF506       | eBioRDR5        | eBioscience | 69-1278-42 | 1:50     |
| CD25         | Biotin      | M-A251          | Biolegend   | 356124     | 1:25     |
| CD25         | PE          | M-A251          | Biolegend   | 356104     | 1:500    |
| CD3          | PE-Cy7      | UCHT1           | Biolegend   | 300420     | 1:50     |
| CD3          | APC-Cy7     | UCHT1           | Biolegend   | 300426     | 1:500    |
| STAT5        | Ax647       | 47/Stat5(pY694) | BD          | 562076     | 1:20     |
| Streptavidin | BV421       | N/A             | Biolegend   | 405225     | 1:200    |
| FOXP3        | PE          | 259D            | Biolegend   | 320208     | 1:25     |

**Supplementary Figure 16.** Gating strategies for flow cytometry analysis of pSTAT5 induction in primary human PBMC.

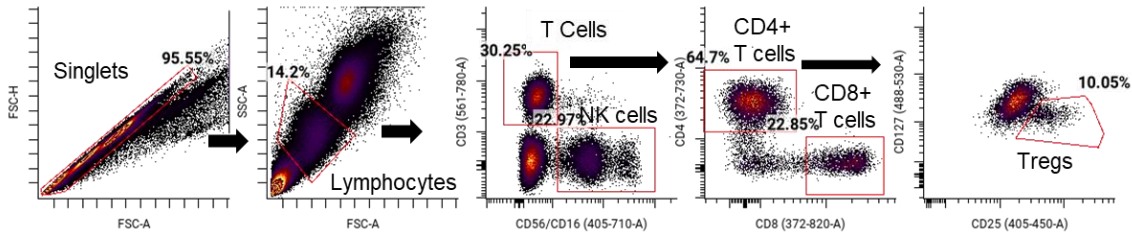

**Gating strategies for flow cytometry analysis of pSTAT5 induction in primary human PBMC.** The Flow Cytometry fcs files were gated on singlets using FSC-A by FSC-H to exclude any aggregates or doublets. Within this gate the cells were gated on mid to high forward scatter (FSC-A) and side scatter (SSC-A) to exclude the red blood cells, debris, and granulocytes (Lymphocyte gate). The T cells were then gated as the CD3+, CD56/16 negative population. The NK cells were identified as the CD3 negative, CD56/16 high population. The T cells were then divided into CD4+ T cells and CD8+ T cells. Finally, Tregs were gated from the CD4+ T cells as the CD25<sup>hi</sup> x C127<sup>lo</sup> population.

**Supplementary Table 12.** Antibody panel used to profile the immune cell phenotyping from mouse whole blood samples.

| Antigen      | Fluorophore      | Clone            | Vendor     | Catalog #   | dilution |
|--------------|------------------|------------------|------------|-------------|----------|
| CD3          | Ax488            | 17A2             | Biologend  | 100210      | 1:400    |
| CD4          | Bv786            | RM4-5            | Biologend  | 100552      | 1:200    |
| CD8          | Bv711            | 53-6.7           | Biologend  | 100759      | 1:100    |
| NK1.1        | Bv421            | PK136            | Biologend  | 108741      | 1:25     |
| CD25         | Biotin           | REA568           | Miltenyi   | 130-108-995 | 1:25     |
| FoxP3        | PE               | FJK-16s          | Invitrogen | 12-5773-82  | 1:25     |
| CD44         | PEcy7            | IM7              | Biologend  | 103030      | 1:1000   |
| Ki67         | PerCP eFluor 710 | SolA15           | Invitrogen | 46-5698-82  | 1:500    |
| Streptavidin | BUV395           | -                | BD         | 564176      | 1:1000   |
| pStat5       | Ax647            | 47/Stat5 (pY694) | BD         | 612599      | 1:5      |



**Supplementary Table 13.** Antibody panel used to profile the immune cell phenotyping for tumor and spleen samples in B16-F10 tumor PK/PD study.

| Antigen | Fluorophore | Clone     | Vendor      | Catalog#   | □ g/mL |
|---------|-------------|-----------|-------------|------------|--------|
| CD45    | PEcy7       | 30-F11    | Biologend   | 103114     | 2.5    |
| CD3e    | BUV395      | 17A2      | BD          | 740268     | 2      |
| CD4     | APC-eF780   | GK1.5     | eBioscience | 47-0041-80 | 1.25   |
| CD8a    | PE-eF610    | 53-6.7    | eBioscience | 61-0081-82 | 5      |
| CD335   | BV605       | 29A1.4    | Biologend   | 137619     | 7      |
| CD44    | BV421       | IM7       | Biologend   | 103040     | 2.5    |
| Foxp3   | PE          | FJK-16s   | eBioscience | 12-5773-82 | 10     |
| L/D     | eFluor 506  | -         | eBioscience | 65-0866-18 | -      |
| CD122   | BV711       | TM-Beta 1 | BD          | 740679     | 2      |
| CD62L   | Percpcy5.5  | MEL-14    | Biologend   | 104412     | 2.5    |
| Ki67    | AF488       | 11F6      | Biologend   | 151204     | 2.5    |
| CD49b   | APC         | DX5       | Biologend   | 108910     | 2.5    |
| CD25    | AF700       | PC61      | Biologend   | 102024     | 2.5    |

The combination of the following biomarkers were used to identify the cell population reported in this study.

| Cell Type                 | Marker Profile                  |
|---------------------------|---------------------------------|
| Effector T cells (Teff)   | CD3+, CD4+, CD8+                |
| CD8+ memory cells         | CD3+, CD8+, CD44+               |
| NK cells                  | CD3-, CD335+ CD49b+             |
| Regulatory T cells (Treg) | CD3+, CD4+, CD8-, CD25+, FoxP3+ |
| Proliferation             | Ki67+                           |
